# Supplementary material for: Penta-OsP2 and penta-Rhs2 sheets derived from marcasite and pyrite with low lattice thermal conductivity
Source: Royal Society of Chemistry journal article supplement (doi:10.1039/d2ta05258j), 2022-01-01
Supplement: d2ta05258j1.pdf [file d2ta05258j1.pdf]

## Electronic Supplementary Information

### **Penta-OsP<sub>2</sub> and Penta-RhS<sub>2</sub> Sheets Derived from Marcasite and Pyrite with Low Lattice Thermal Conductivity**

Yiheng Shen,<sup>a</sup> Jie Sun,<sup>a</sup> Yanyan Chen,<sup>a</sup> Dongyuan Ni,<sup>a</sup> Tingwei Li,<sup>a</sup> Akira

Yoshikawa,<sup>b</sup> Yoshiyuki Kawazoe,<sup>c</sup> and Qian Wang<sup>\*a</sup>

<sup>a</sup> CAPT, School of Materials Science and Engineering, BKL-MEMD, Peking University, Beijing 100871, China.

<sup>b</sup> Institute for Materials Research, Tohoku University, Sendai, 980-8577, Japan;

<sup>c</sup> New Industry Creation Hatchery Center, Tohoku University, Sendai, 980-8577, Japan;

Department of Physics, Suranaree University of Technology, 30000 Nakhon Ratchasima, Thailand; Department of Physics and Nanotechnology, SRM Institute of Science and Technology, Kattankulathur, Tamil Nadu 603203, India.

\* Author to whom any correspondence should be addressed: [qianwang2@pku.edu.cn](mailto:qianwang2@pku.edu.cn)

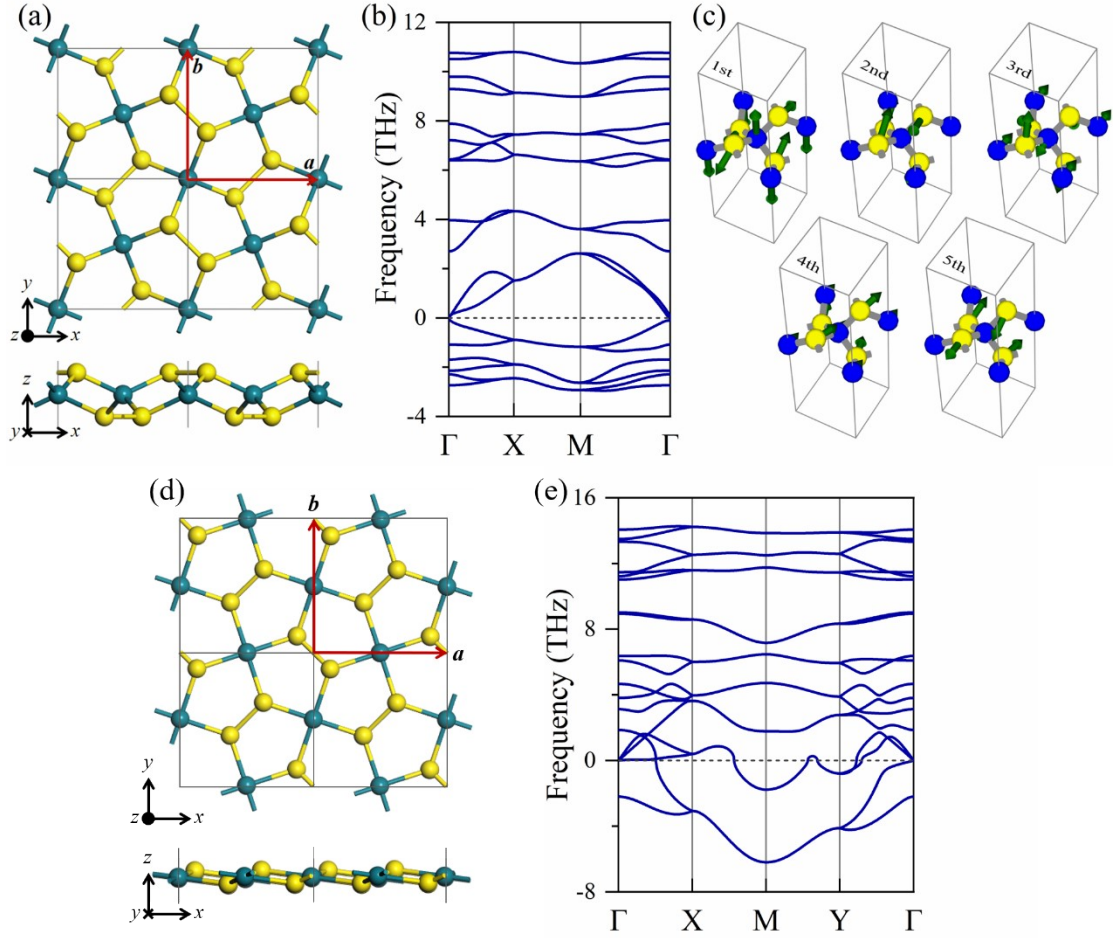

**Fig. S1** (a) Geometry, (b) phonon band structure, and (c) imaginary phonon modes of the tetragonal  $\text{RhS}_2$  sheet with the penta- $\text{CN}_2$  configuration. (d) Geometry and (e) phonon band structure of the orthorhombic  $\text{RhS}_2$  sheet with the penta- $\text{PdSe}_2$  configuration.

**Text S1** Thermal stability of penta- $\text{RhS}_2$  at 600 K

We perform an AIMD simulation for a  $3 \times 3 \times 1$  supercell of the penta- $\text{RhS}_2$  primitive cell under the NPT ensemble (600 K and 100 kPa) for a simulation time of 10 ps with a time step of 1 fs. The variation of the supercell size with the simulation time is plotted in Fig. S2(a). We use the average lattice parameters from the last 5 ps as the reasonable size of the supercell for the following up NVT simulation at 600 K. The lattice parameter  $a$  ( $b$ ) slightly shrinks from the original value of 13.41 Å to 13.32 (13.12) Å

due to the expansion in the out-of-plane direction. As shown in Fig. S2(b), the total potential energy shifts toward a lower energy level during the NVT simulation, which is consistent with our original result that penta-RhS<sub>2</sub> is thermally unstable above 500 K.

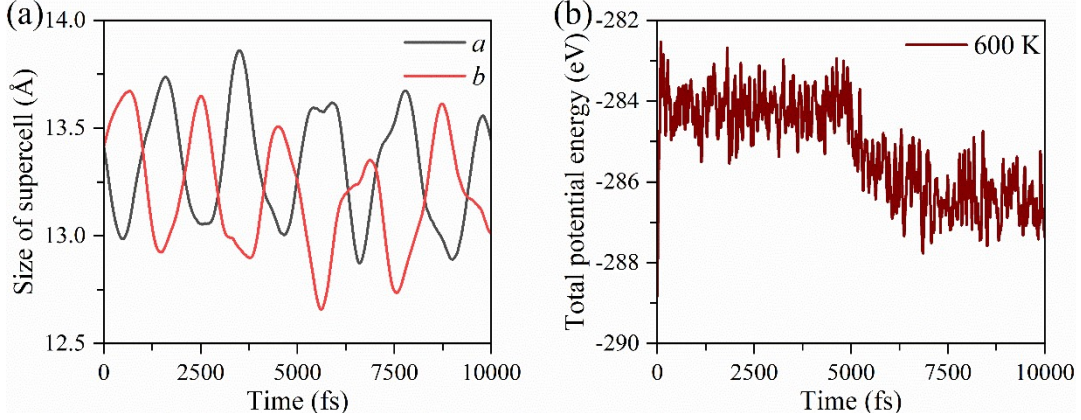

**Fig. S2** Vibration of (a) the size of penta-RhS<sub>2</sub> supercell in NPT simulation, and (b) the total potential energy of the supercell in NVT simulation with simulation time.

### Text S2 Mechanical properties of penta-OsP<sub>2</sub> and penta-RhS<sub>2</sub>

We calculate the Young's modulus  $E$  and Poisson's ratio  $\nu$  of penta-OsP<sub>2</sub> and penta-RhS<sub>2</sub> from their stiffness tensor components  $C_{ij}$  based on the following equations:

$$E(\theta) = \frac{C_{11}C_{22} - C_{12}^2}{C_{11}s^4 + C_{22}c^4 + \left( \frac{C_{11}C_{22} - C_{12}^2}{C_{66}} - 2C_{12} \right) s^2c^2}, \quad (\text{S1})$$

and

$$\nu(\theta) = \frac{C_{12}(s^4 + c^4) - \left( C_{11} + C_{22} - \frac{C_{11}C_{22} - C_{12}^2}{C_{66}} \right) s^2c^2}{C_{11}s^4 + C_{22}c^4 + \left( \frac{C_{11}C_{22} - C_{12}^2}{C_{66}} - 2C_{12} \right) s^2c^2}, \quad (\text{S2})$$

where  $\theta$  is the angle between a specific in-plane direction and the crystalline orientation [100],  $s = \sin\theta$ , and  $c = \cos\theta$ . The calculated results are plotted in Fig. S2. The Young's

modulus of penta-OsP<sub>2</sub> exhibits strong anisotropy. The Young's modulus along the stiffer  $x$  axis (94.96 GPa·nm) is three times larger than that along the  $y$  axis (29.14 GPa·nm), while a maximal value of 105.06 GPa·nm is found at  $\theta = 24^\circ$  and its equivalents, which coincide with the [210] direction in penta-OsP<sub>2</sub>. In contrast, the Young's modulus of penta-RhS<sub>2</sub> shows weak anisotropy along the axial directions  $x$  (65.18 GPa·nm) and  $y$  (61.76 GPa·nm), with a minimal Young's modulus of 30.86 GPa·nm found at  $\theta = 45^\circ$ . It is worth mentioning that, while materials with similar geometric structure and heavier atoms tend to have lower Young's modulus, penta-OsP<sub>2</sub> and penta-RhS<sub>2</sub> serve as a counter example where penta-OsP<sub>2</sub> with heavier Os atom is stiffer along most directions.

The Poisson's ratios of penta-OsP<sub>2</sub> and penta-RhS<sub>2</sub> along the axial directions also show strong and weak anisotropy, respectively. The Poisson's ratio of penta-OsP<sub>2</sub> has its maximum value of 0.56 along the  $x$  axis and its minimum value of  $-0.24$  at  $\theta = 41^\circ$ , corresponding to the [110] direction in penta-OsP<sub>2</sub>. While, the maximum (0.61) and minimum (0.19) of the Poisson's ratios of penta-RhS<sub>2</sub> are found at  $\theta = 44^\circ$  and  $90^\circ$ , respectively.

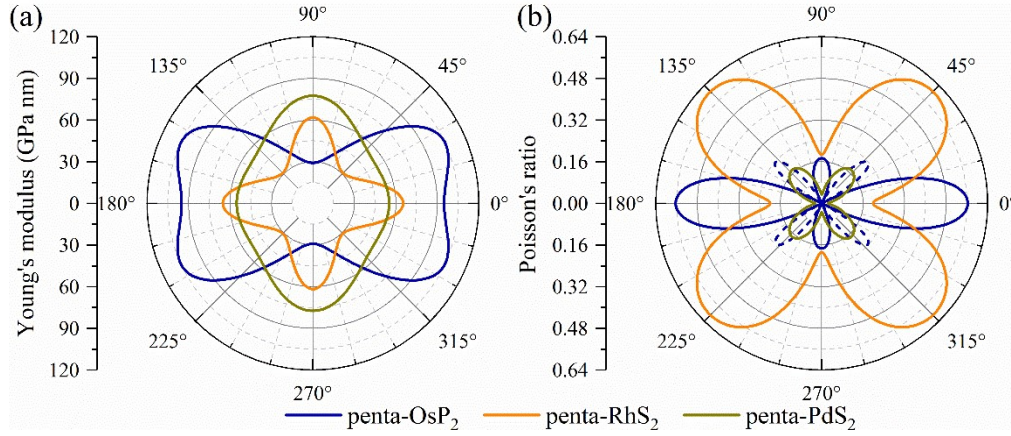

**Fig. S3** (a) Young's modulus, and (b) Poisson's ratio of penta-OsP<sub>2</sub>, penta-RhS<sub>2</sub>, and penta-PdS<sub>2</sub> with respect to the orientation of external stress. The blue dashed lines indicate the negative Poisson's ratio.

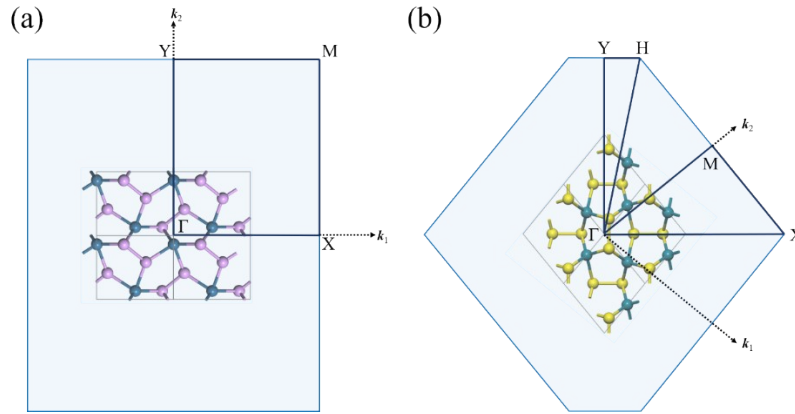

**Fig. S4** First Brillouin zone and high-symmetry path of (a) the unit cell of penta-OsP<sub>2</sub> and (b) the primitive cell of penta-RhS<sub>2</sub>.

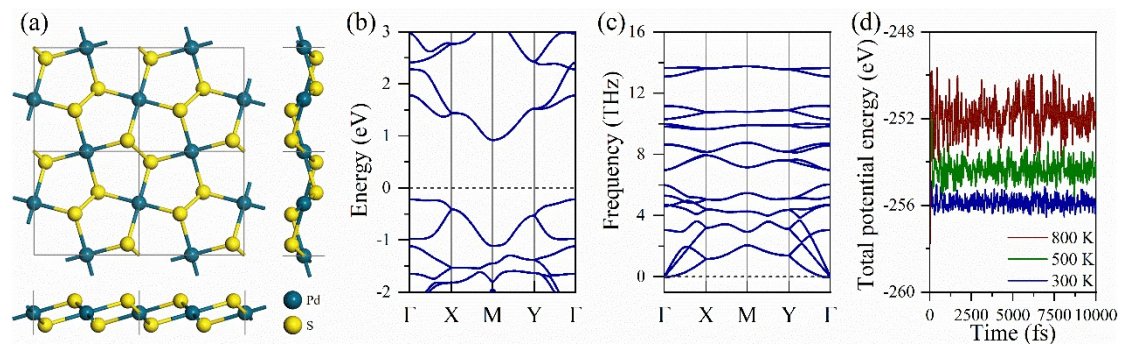

**Fig. S5** (a) Geometry, (b) electronic band structure and (c) phonon spectrum of penta-PdS<sub>2</sub>. (d) Total potential energy fluctuation of penta-PdS<sub>2</sub> with a 3×3×1 supercell during AIMD simulations.

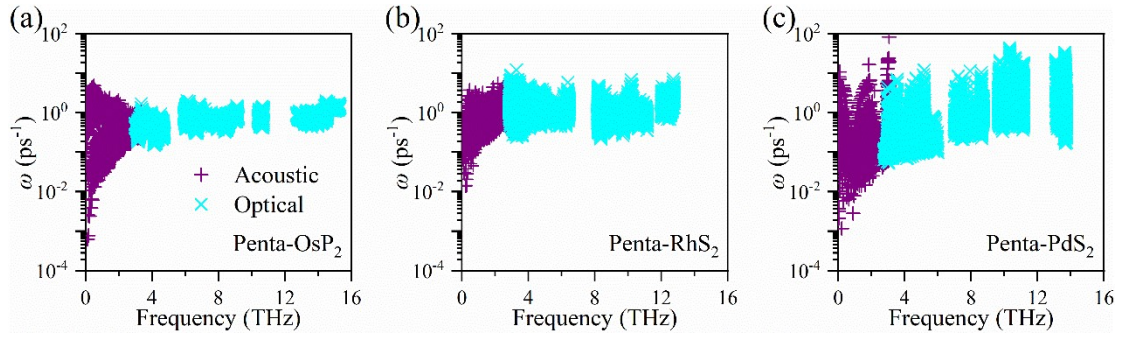

**Fig. S6** Overall scattering rate  $\omega$  of (a) penta-OsP<sub>2</sub>, (b) penta-RhS<sub>2</sub>, and (c) penta-PdS<sub>2</sub>.

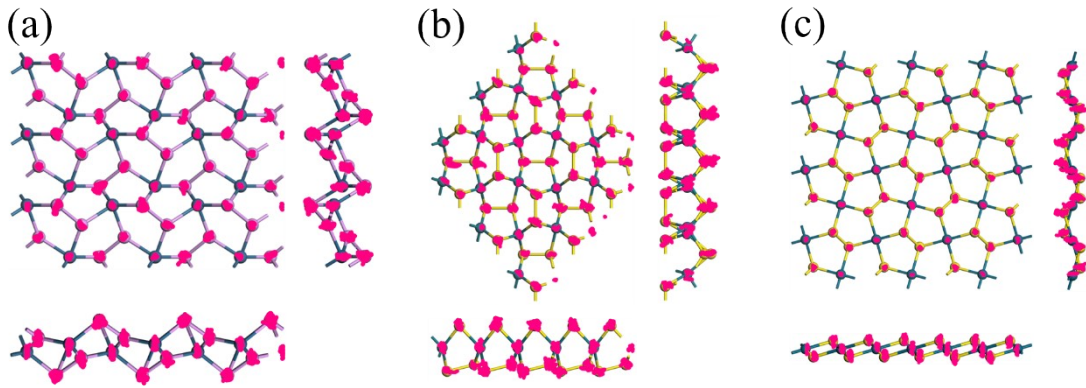

**Fig. S7** Trajectory of the atoms in the supercell of (a) penta-OsP<sub>2</sub>, (b) penta-RhS<sub>2</sub>, and (c) penta-PdS<sub>2</sub> during AIMD simulations at 300 K.

**Table S1** Cutoff radii  $r_{2\text{nd}}$ ,  $r_{3\text{rd}}$  and  $r_{4\text{th}}$  (in Å) used in the HiPhive fitting in penta-OsP<sub>2</sub>, penta-RhS<sub>2</sub> and penta-PdS<sub>2</sub>, and the corresponding number of parameters ( $n_{\text{para}}$ ), number of target values ( $n_{\text{target}}$ ), and the goodness of fit ( $R^2$ ) in the training set and test set, respectively.

| Structure              | $r_{2\text{nd}}$ | $r_{3\text{rd}}$ | $r_{4\text{th}}$ | $n_{\text{para}}$ | $n_{\text{target}}$ | $R^2_{\text{train}}$ | $R^2_{\text{test}}$ |
|------------------------|------------------|------------------|------------------|-------------------|---------------------|----------------------|---------------------|
| penta-OsP <sub>2</sub> | 7.8              | 6.0              | 3.2              | 7027              | 43200               | 0.99979              | 0.99969             |
| penta-RhS <sub>2</sub> | 8.9              | 6.0              | 3.2              | 8740              | 57600               | 0.99936              | 0.99898             |
| penta-PdS <sub>2</sub> | 10.9             | 6.0              | 3.2              | 2100              | 17280               | 0.99998              | 0.99997             |

**Table S2** Bader charge distribution (in number of electrons) on the atoms in penta-OsP<sub>2</sub> and penta-RhS<sub>2</sub>.

| penta-OsP <sub>2</sub> |              | penta-RhS <sub>2</sub> |              |
|------------------------|--------------|------------------------|--------------|
| Atom                   | Bader charge | Atom                   | Bader charge |
| 2a <sub>1</sub> Os     | 0.02         | 4b <sub>1</sub> Rh     | -0.27        |
| 2a <sub>2</sub> P      | -0.03        | 4b <sub>2</sub> S      | 0.11         |
| 2a <sub>3</sub> P      | 0.01         | 2a <sub>1</sub> S      | 0.18         |
|                        |              | 2a <sub>2</sub> S      | 0.13         |

**Table S3** Deformation potential  $E_1$  (in eV), effective mass  $m^*$  (normalized by the mass of an electron), and the mobility  $\mu$  (in cm<sup>2</sup>·V<sup>-1</sup>·s<sup>-1</sup>) of holes and electrons in penta-OsP<sub>2</sub>, penta-RhS<sub>2</sub> and penta-PdS<sub>2</sub> along the  $x$  and  $y$  directions at 300 K.

| Structure              | Direction | Carrier  | $E_1$ | $m^*$  | $\mu$   |
|------------------------|-----------|----------|-------|--------|---------|
| penta-OsP <sub>2</sub> | $x$       | electron | -1.75 | 0.31   | 1857.09 |
|                        | $x$       | hole     | -1.52 | -0.42  | 273.64  |
|                        | $y$       | electron | -3.46 | 0.79   | 404.25  |
|                        | $y$       | hole     | -4.11 | -11.60 | 4.86    |
| penta-RhS <sub>2</sub> | $x$       | electron | -8.02 | 2.69   | 3.59    |
|                        | $x$       | hole     | -4.80 | -0.33  | 180.55  |
|                        | $y$       | electron | -3.62 | 4.58   | 2.99    |
|                        | $y$       | hole     | -6.34 | -1.95  | 26.51   |
| penta-PdS <sub>2</sub> | $x$       | electron | -7.72 | 1.17   | 25.40   |
|                        | $x$       | hole     | -3.80 | -3.74  | 9.36    |
|                        | $y$       | electron | -7.17 | 0.46   | 67.60   |
|                        | $y$       | hole     | -3.50 | -2.13  | 18.56   |
